# Supplementary material for: Blue light effect on retinal pigment epithelial cells by display devices
Source: Royal Society of Chemistry journal article supplement (doi:10.1039/c7ib00032d), 2017-01-01
Supplement: c7ib00032d1.pdf [file c7ib00032d1.pdf]

**Supplementary Figure 1.**

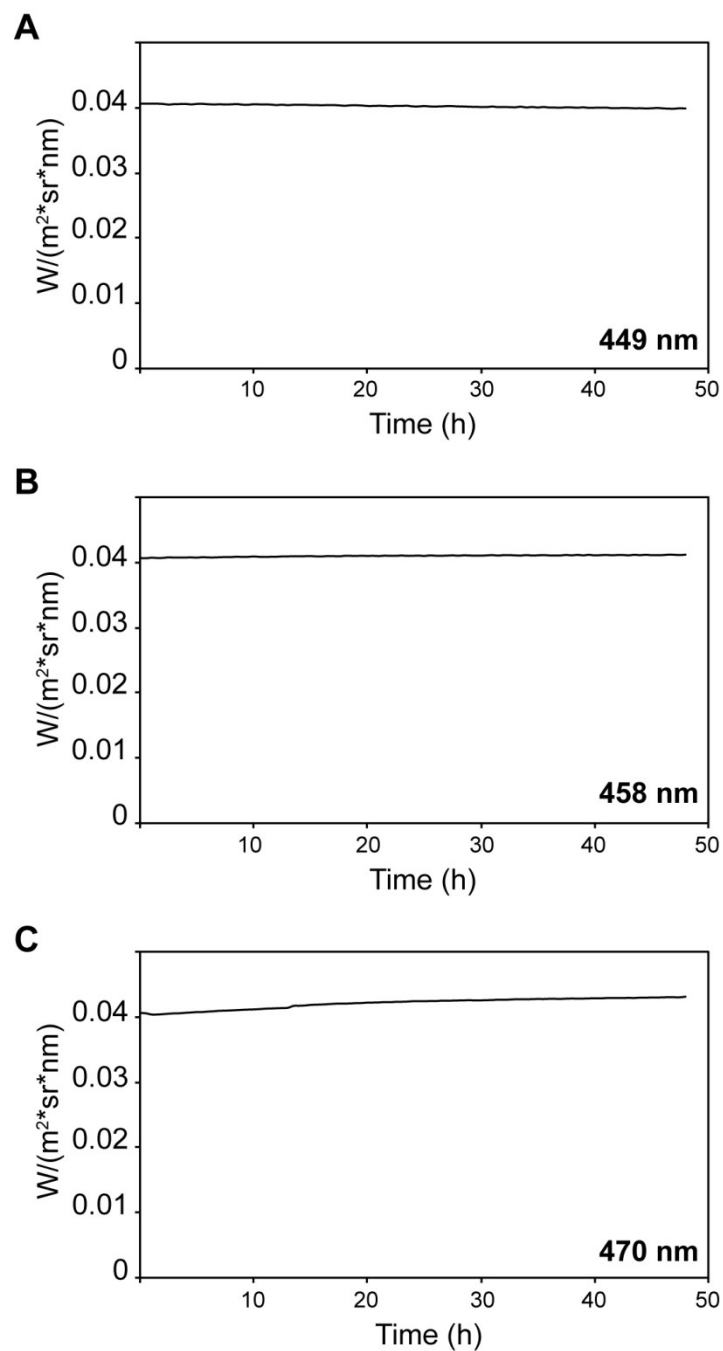

Supplementary Fig. 1. The intensity of display devices was maintained constant. Before the display devices with different blue light spectra were exposed to A2E-loaded ARPE-19 cells, the intensities of light sources were measured for 48 h by Display Color Analyzer.
